# Supplementary material for: Reactive oxygen species (ROS)-responsive ferrocene-polymer-based nanoparticles for controlled release of drugs
Source: Royal Society of Chemistry journal article supplement (doi:10.1039/c9tb02533b), 2020-01-01
Supplement: c9tb02533b1.pdf [file c9tb02533b1.pdf]

## Supporting Information

### Reactive oxygen species (ROS)-responsive ferrocene-polymer-based nanoparticles for controlled release of drugs

Yoonhee Na<sup>a,b</sup>, Jin Sil Lee<sup>a,c</sup>, Jiseob Woo<sup>a,b</sup>, Sukyung Ahn<sup>d</sup>, Eunhye Lee<sup>d</sup>, Won Il Choi<sup>a\*</sup> and Daekyung Sung<sup>a\*</sup>

<sup>a</sup> Center for Convergence Bioceramic Materials, Convergence R&D Division, Korea Institute of Ceramic Engineering and Technology, 202, Osongsaengmyeong 1-ro, Osong-eup, Heungdeok-gu, Cheongju, Chungbuk 28160, Republic of Korea.

<sup>b</sup> School of Chemical & Biomolecular Engineering, Yonsei University, 50 Yonsei Ro, Seodaemun Gu, Seoul, 03722, Republic of Korea.

<sup>c</sup> School of Materials Science and Engineering, Gwangju Institute of Science and Technology, 123 Cheomdan-gwagiro, Buk-gu, Gwangju 61005, Republic of Korea.

<sup>d</sup> Utah-Inha DDS and Advanced Therapeutics Research Center, 3F, Venture-ro 100beon-gil, Yeonsu-gu, Incheon, 22013, Republic of Korea.

\* To whom the correspondence should be made

E-mail: [choi830509@kicet.re.kr](mailto:choi830509@kicet.re.kr) / Phone: 82-43-913-1513 / Fax: 82-43-913-1597

E-mail: [dksung@kicet.re.kr](mailto:dksung@kicet.re.kr) / Phone: 82-43-913-1511 / Fax: 82-43-913-1597

Supplementary Table S1. The yields of the ferrocene-containing polymers.

| <b>Polymer groups</b> | <b>Yield (%)</b> |
|-----------------------|------------------|
| Poly C0.5             | 97.3 %           |
| Poly C1               | 95.1 %           |
| Poly C2               | 99.7 %           |
| Poly C3               | 98.1 %           |

Supplementary Table S2. The diameters of the FNPs observed via TEM.

| <b>FNP groups</b> | <b>Diameter (TEM)</b> |
|-------------------|-----------------------|
| FNP(C0.5)         | 250 ± 31 nm           |
| FNP(C1)           | 208 ± 38 nm           |
| FNP(C2)           | 164 ± 28 nm           |
| FNP(C3)           | 111 ± 18 nm           |

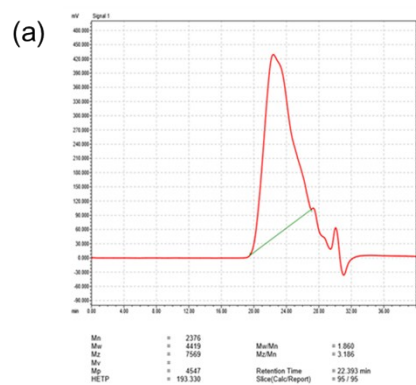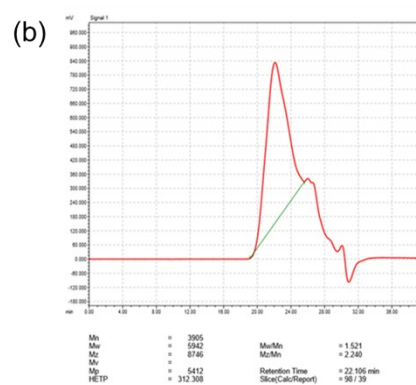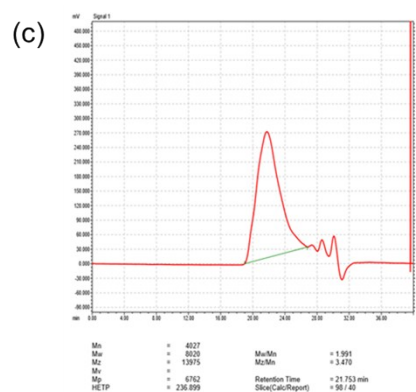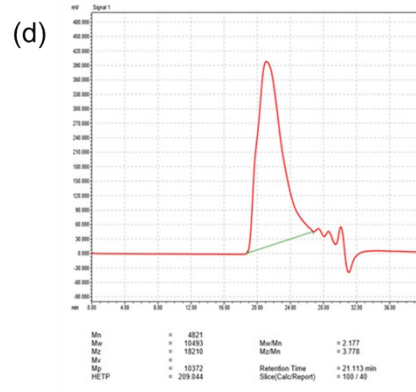

Supplementary Figure S1. The original GPC curves of the ferrocene-containing polymers (Poly(FMMA-*r*-MA)); (a) Poly C0.5, (b) Poly C1, (c) Poly C2, and (d) Poly C3.

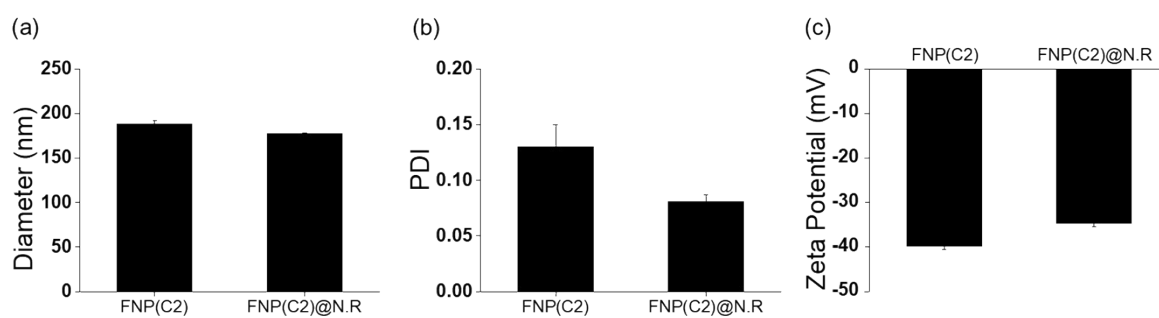

Supplementary Figure S2. The physicochemical characteristics of the FNP(C2) and Nile red-loaded the Nile red-containing FNP(C2).
